# Supplementary material for: Prognostic Effect of Long Noncoding RNA NEAT1 Expression Depends on p53 Mutation Status in Cancer
Source: Hindawi journal article supplement (doi:10.1155/2019/4368068), 2019-05-02
Supplement: f1 [file 4368068.f1.zip]

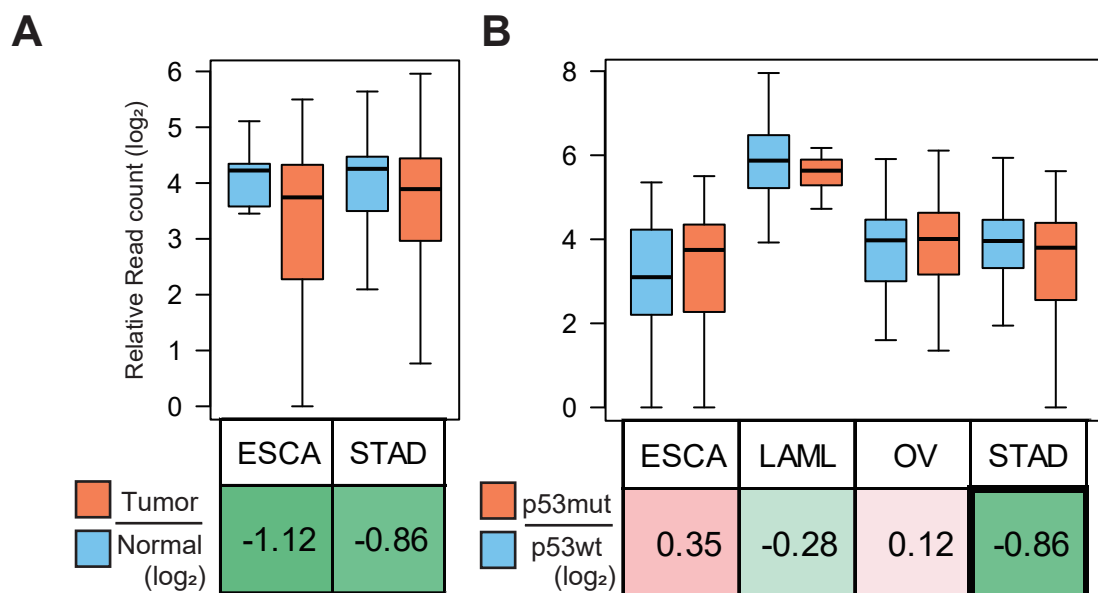

### Supplementary Figure 2.

Comparisons of long form NEAT1 (NEAT1\_2) expression.

(A) RNA-seq data of normal and tumor tissues in TCGA database were analyzed, and NEAT1\_2 expression is presented in the boxplot. Tumor/Normal ratios are indicated as  $\log_2$  values in the box under the tissue labels.

(B) RNA-seq data of tumor tissues in TCGA database were divided into p53 wild-type (p53wt) and p53 mutant (p53mut) groups and then analyzed. NEAT1\_2 expression is presented in the boxplot. p53mut/p53wt ratios are indicated as  $\log_2$  values in the box under the tissue labels.

In (A) and (B), significant changes ( $p < 0.05$  by two-sided Welch' s t-test after the confirmation of normal distributions) are marked with a bold frame.
