# Supplementary material for: Prognostic Effect of Long Noncoding RNA NEAT1 Expression Depends on p53 Mutation Status in Cancer
Source: Hindawi journal article supplement (doi:10.1155/2019/4368068), 2019-05-02
Supplement: f1 [file 4368068.f1.zip]

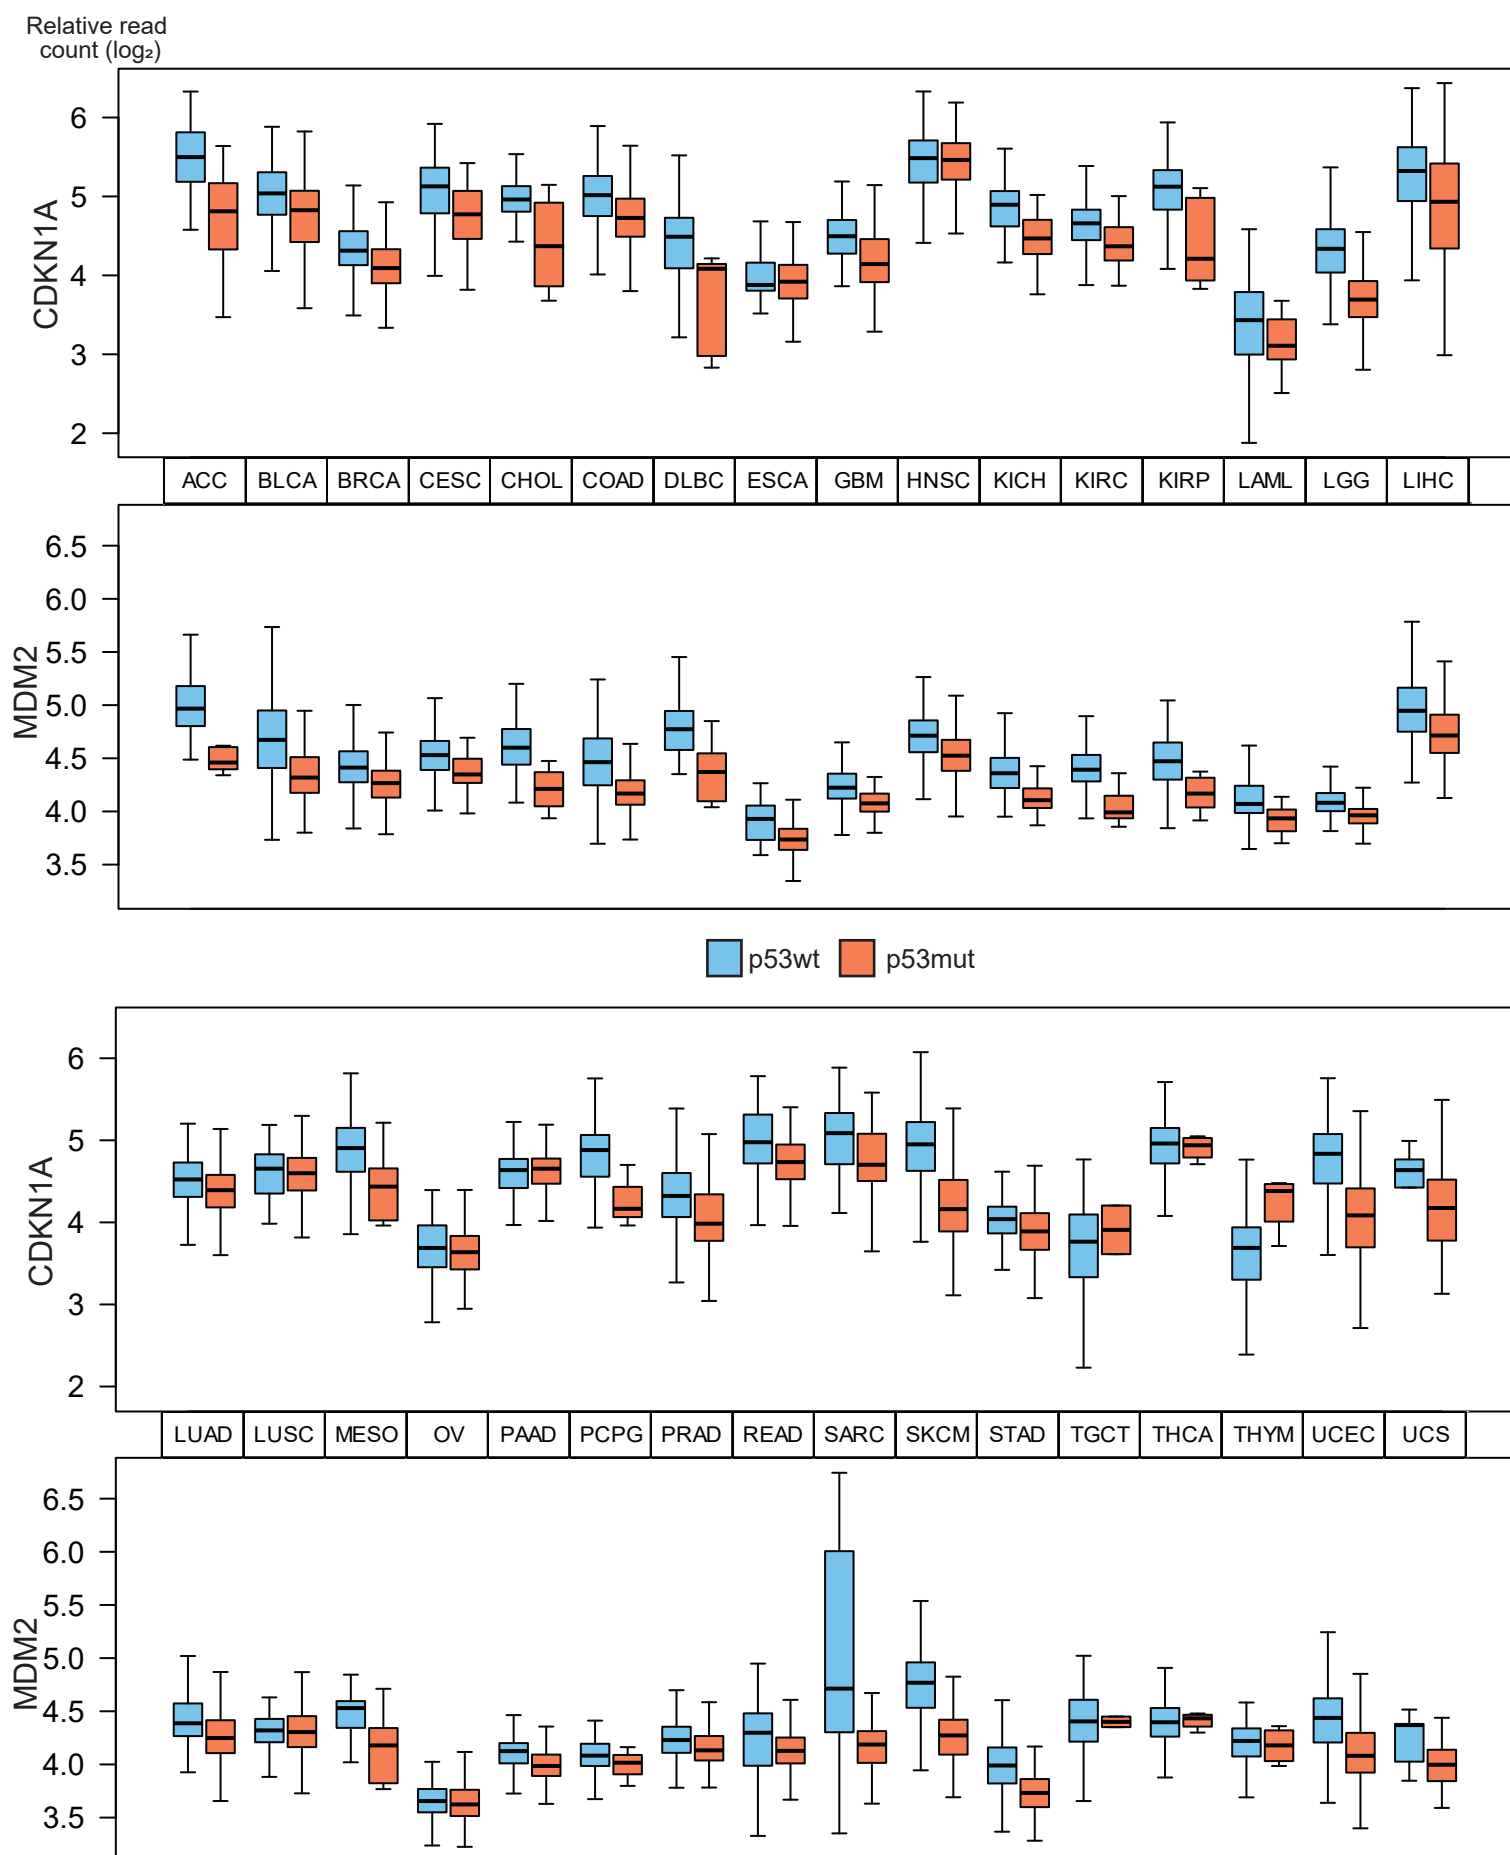

**Supplementary Figure 1.**

Comparisons of CDKN1A and MDM2 expression between p53 wild-type and mutated cancer types. RNA-seq data of tumor tissues in TCGA database were divided into p53 wild-type (p53wt) and p53 mutant (p53mut) groups and then analyzed. CDKN1A and MDM2 expression levels are presented in boxplots.
