# Supplementary material for: Prognostic Effect of Long Noncoding RNA NEAT1 Expression Depends on p53 Mutation Status in Cancer
Source: Hindawi journal article supplement (doi:10.1155/2019/4368068), 2019-05-02
Supplement: f1 [file 4368068.f1.zip]

Supplementary Figure 3

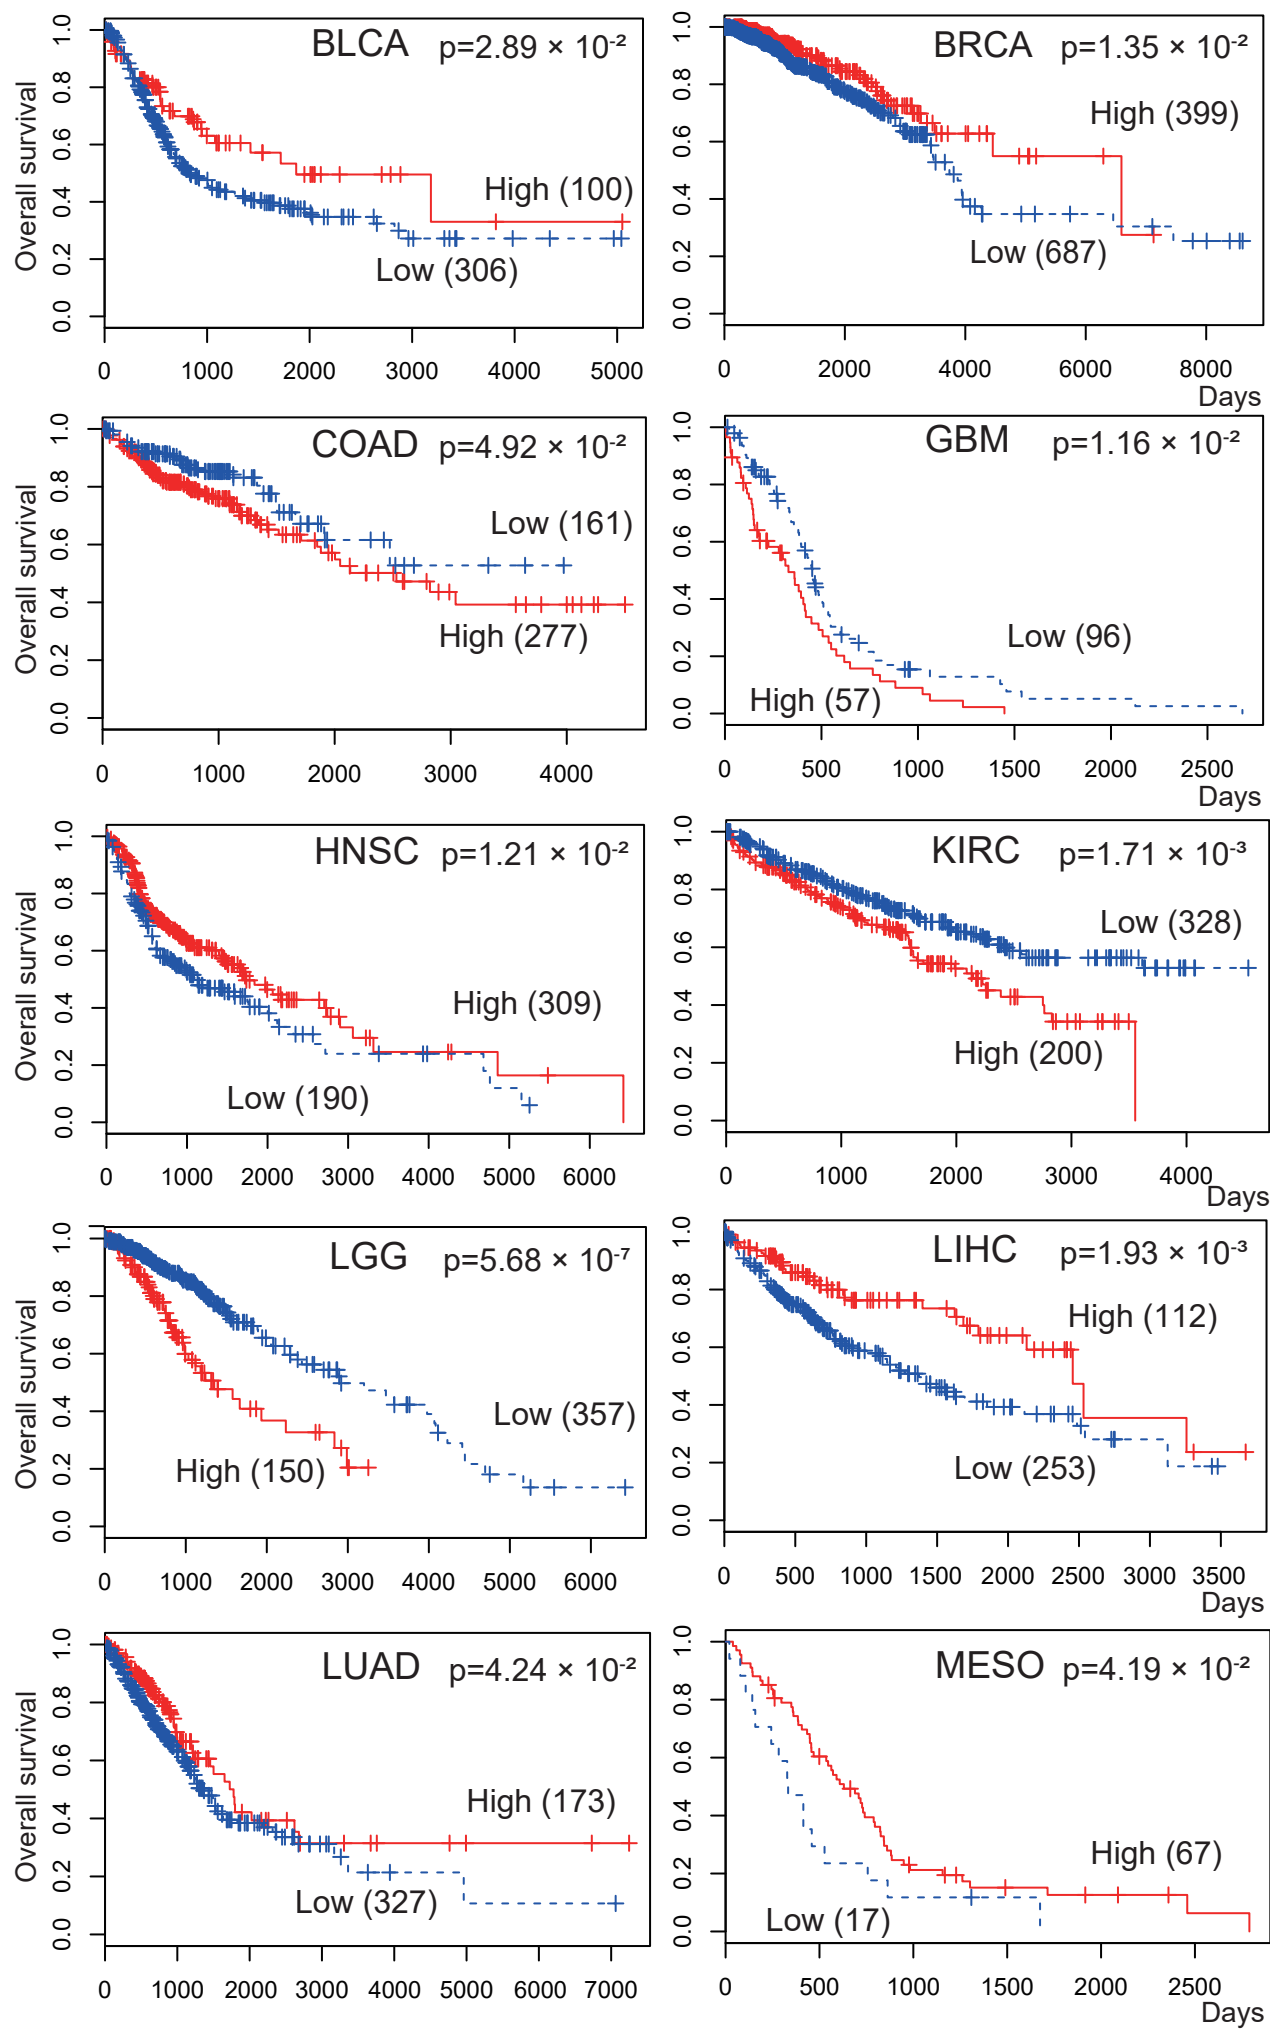

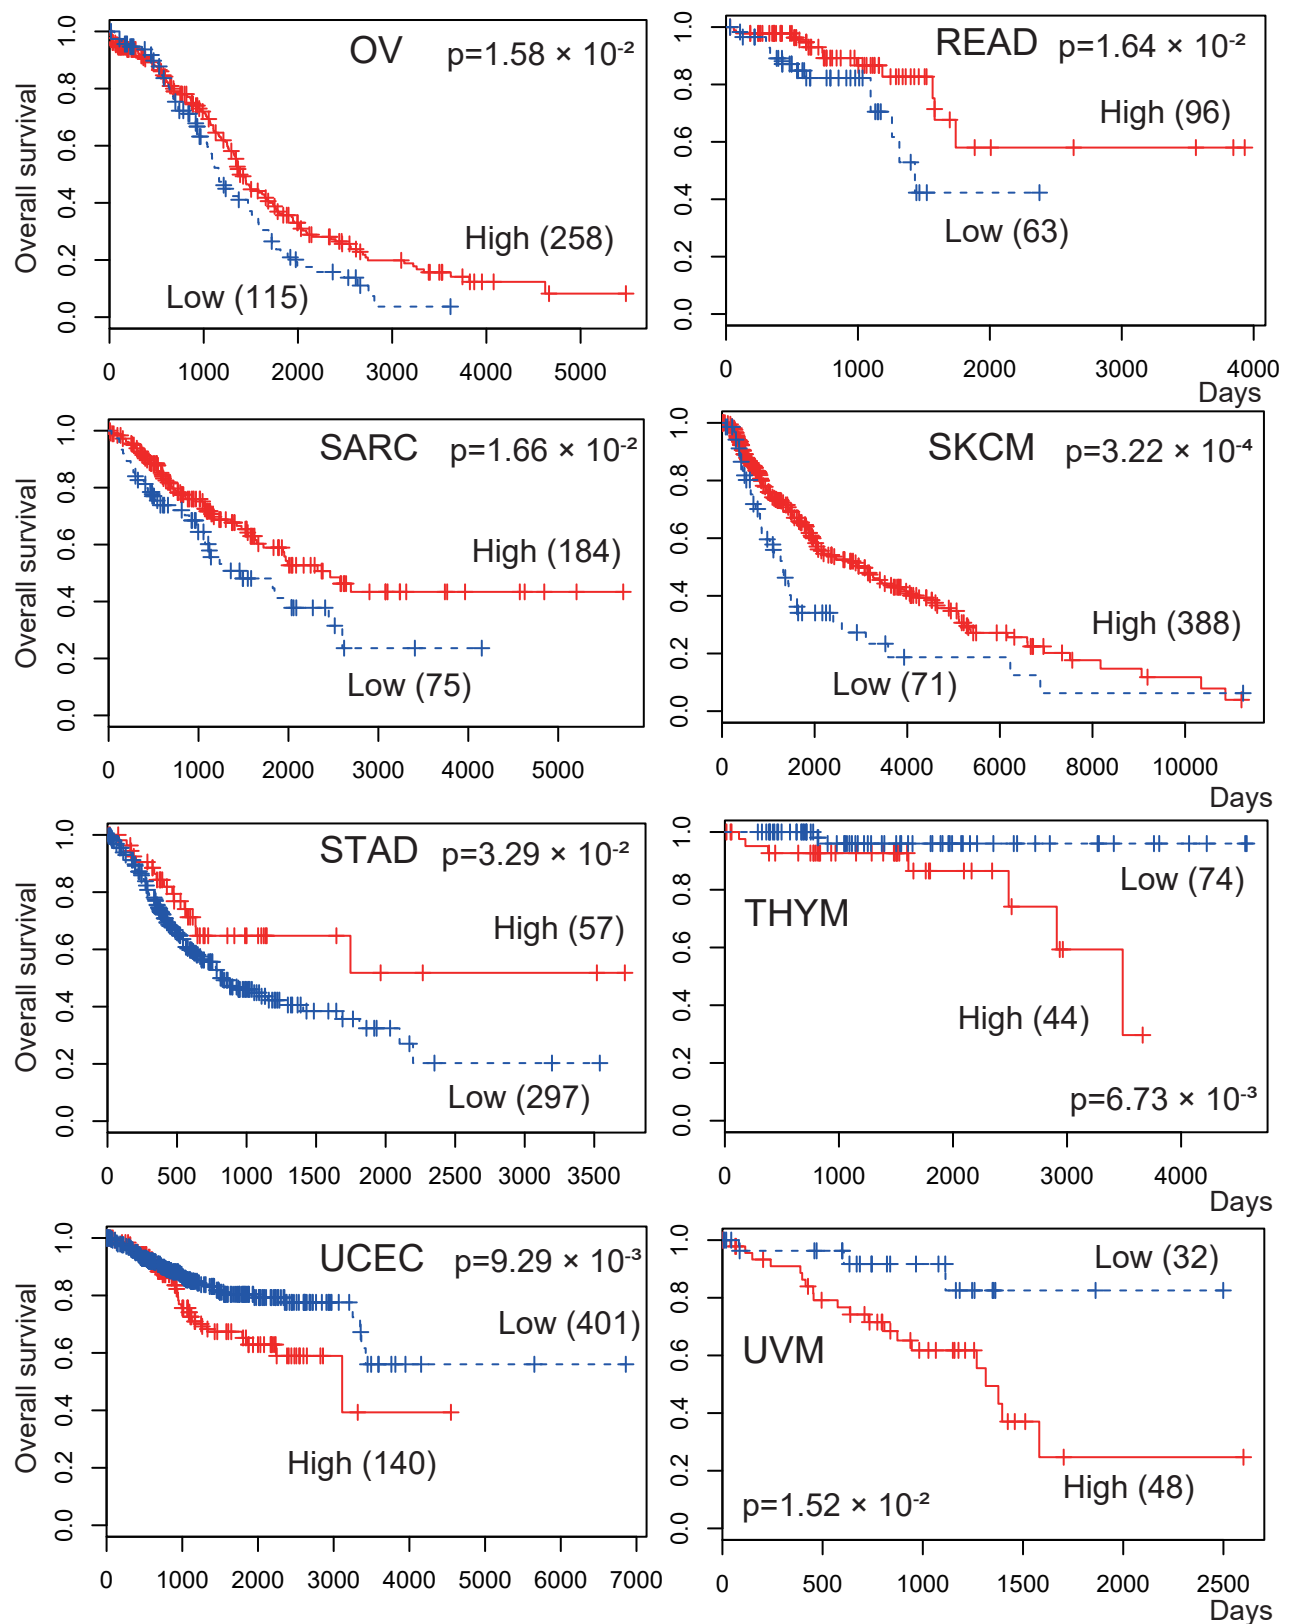

### Supplementary Figure 3.

Correlation between NEAT1 expression and prognosis among cancer patients.

In RNA-seq data from the indicated four TCGA projects, the correlation between NEAT1 expression and survival was analyzed and plotted using the Kaplan-Meier method. The survival rates for patients with high and low NEAT1 expression are plotted as red and blue lines, respectively. The number of patients in each group is shown in parentheses. p values were calculated using a log-rank test.
