# Supplementary material for: Prognostic Effect of Long Noncoding RNA NEAT1 Expression Depends on p53 Mutation Status in Cancer
Source: J Oncol. 2019 May 2;2019:4368068. doi: 10.1155/2019/4368068 (PMC6521466; doi:10.1155/2019/4368068)
Supplement: Supplementary Materials — Supplementary Figure 1. Comparisons of CDKN1A and MDM2 expression between p53 wild-type and mutated cancer types. Supplementary Figure 2. Comparisons of long form NEAT1 (NEAT1_2) expression. Supplementary Figure 3. Correlation between NEAT1 expression and prognosis among cancer patients. Supplementary Figure 4. Correlation between NEAT1 expression and prognosis based on p53 status. Supplementary Table 1. The summary of analyzed data. [file 4368068.f1.zip]

Archive with 5 entries (5 files):
- Suppl/FigS1.pdf
- Suppl/FigS2.pdf
- Suppl/FigS3.pdf
- Suppl/FigS4.pdf
- Suppl/TableS1.xlsx
