# Supplementary material for: Prognostic Effect of Long Noncoding RNA NEAT1 Expression Depends on p53 Mutation Status in Cancer
Source: J Oncol. 2019 May 2;2019:4368068. doi: 10.1155/2019/4368068 (PMC6521466; doi:10.1155/2019/4368068)
Supplement: Supplementary Materials — Supplementary Figure 1. Comparisons of CDKN1A and MDM2 expression between p53 wild-type and mutated cancer types. Supplementary Figure 2. Comparisons of long form NEAT1 (NEAT1_2) expression. Supplementary Figure 3. Correlation between NEAT1 expression and prognosis among cancer patients. Supplementary Figure 4. Correlation between NEAT1 expression and prognosis based on p53 status. Supplementary Table 1. The summary of analyzed data. [file 4368068.f1.zip › Suppl/TableS1.xlsx]

## Sheet: Sheet1
Supplementary Table 1.
The summary of analyzed data.												Groups according to NEAT1 expression*3
								TP53 status				All			TP53 wildtype			TP53 mutant
TCGA project	Tissue	Case	Survival data	RNA-seq	Normal	Primary tumor	Other tumors*1	Wildtype	Mutation*2	Unknown		High	Low		High	Low		High	Low
ACC	Adrenocortical carcinoma	79	79	79	0	79	0	62	16	1		13	66		na
BLCA	Bladder urothelial carcinoma	408	406	433	19	414	0	205	209	0		100	306		176	25		67	138
BRCA	Breast invasive carcinoma	1092	1086	1222	113	1102	7	732	356	21		399	687		325	395		287	65
CESC	Cervical squamous cell carcinoma and endocervical adenocarcinoma	304	291	309	3	304	2	269	25	12		43	248		101	156		26	8
CHOL	Cholangiocarcinoma	36	36	45	9	36	0	32	4	0		29	7		na
COAD	Colon adenocarcinoma	456	438	521	41	478	2	235	223	22		277	161		89	122		63	144
DLBC	Lymphoid Neoplasm diffuse Large B-cell Lymphoma	48	47	48	0	48	0	43	5	0		18	29		na
ESCA	Esophageal carcinoma	164	161	173	11	161	1	19	139	4		39	122		na
GBM	Glioblastoma multiforme	166	153	174	5	156	13	105	56	8		57	96		40	59		14	39
HNSC	Head and neck squamous cell carcinoma	501	499	546	44	500	2	145	350	7		309	190		23	121		184	171
KICH	Kidney chromophobe	66	64	89	24	65	0	43	21	1		30	34		na
KIRC	Kidney renal clear cell carcinoma	530	528	611	72	538	1	505	11	23		200	328		na
KIRP	Kidney renal papillary cell carcinoma	289	285	321	32	288	1	274	7	8		89	196		na
LAML	Acute myeloid leukemia	151	132	151	0	151	0	139	12	0		89	43		na
LGG	Brain lower grade glioma	512	507	530	0	512	18	264	246	20		150	357		81	180		210	36
LIHC	Liver hepatocellular carcinoma	371	365	424	50	371	3	254	112	8		112	253		73	176		40	76
LUAD	Lung adenocarcinoma	515	500	595	59	534	2	251	276	9		173	327		62	175		86	177
LUSC	Lung squamous cell carcinoma	501	494	551	49	502	0	82	403	17		268	226		52	29		190	206
MESO	Mesothelioma	86	84	86	0	86	0	72	14	0		67	17		na
OV	Ovarian serous cystadenocarcinoma	376	373	379	0	374	5	129	240	10		258	115		108	21		38	201
PAAD	Pancreatic adenocarcinoma	177	176	182	4	177	1	74	102	2		112	64		18	55		51	52
PCPG	Pheochromocytoma and paraganglioma	179	177	186	3	178	5	174	3	6		92	85		na
PRAD	Prostate adenocarcinoma	496	495	552	52	499	1	416	79	5		181	314		142	270		51	32
READ	Rectum adenocarcinoma	167	159	177	10	166	1	53	101	13		96	63		na
SARC	Sarcoma	259	259	265	2	259	4	135	118	10		184	75		33	102		34	84
SKCM	Skin cutaneous Melanoma	468	459	472	1	103	368	368	74	29		388	71		301	56		51	22
STAD	Stomach adenocarcinoma	380	354	407	32	375	0	188	184	3		57	297		45	131		126	51
TGCT	Testicular germ cell tumors	150	134	156	0	150	6	147	2	7		Excluded due to the low mortality rate
THCA	Thyroid carcinoma	501	500	567	58	501	8	490	4	15		85	415		na
THYM	Thymoma	119	118	121	2	119	0	114	4	1		44	74		na
UCEC	Uterine corpus endometrial carcinoma	555	541	587	35	551	1	335	198	19		140	401		241	91		30	161
UCS	Uterine carcinosarcoma	56	55	56	0	56	0	5	51	0		15	40		na
UVM	Uveal melanoma	80	80	80	0	80	0	80	0	0		48	32		na
				*1 "Other tumors" include metastatic and recurrent tumors.
				*2 "Mutation" includes homologous deletion.
				*3 cases were divided into two groups at minimum p-value point, unless two survival curves intersect each other.
				na: insufficient sample numbers for analysis.
